# Supplementary material
Source: Elsevier journal article supplement (https://www.sciencedirect.com/science/article/pii/S1889183715000392)
Supplement: mmc1 [file S1889183715000392:mmc1.docx]

**Table S1: One sample Kolmogorov Smirnov test of Log base 10 converted HRV Parameters**

|  |  | FFT Spectrum | | | | | |
| --- | --- | --- | --- | --- | --- | --- | --- |
| Log base 10 converted parameters | | LF n.u | HF n.u | VLF ms2 | LF ms2 | HF ms2 | LF/HF |
| Normal Parametersa,b | Mean | 4.0102 | 3.6117 | 5.1481 | 4.7228 | 4.4164 | .1749 |
| Std. Deviation | .30460 | .40555 | 1.24588 | 1.03544 | 1.19857 | .29317 |
| Most Extreme Differences | Absolute | .131 | .067 | .108 | .064 | .103 | .057 |
| Positive | .071 | .045 | .108 | .052 | .051 | .031 |
| Negative | -.131 | -.067 | -.058 | -.064 | -.103 | -.057 |
| Kolmogorov-Smirnov Z | | 1.234 | .632 | 1.011 | .604 | .965 | .537 |
| Asymp. Sig. (2-tailed) | | .095 | .820 | .259 | .859 | .310 | .936 |
|  |  | LS Spectrum | | | | | |
|  |  | LF n.u | HF n.u | VLF ms2 | LF ms2 | HF ms2 | LF/HF |
| Normal Parametersa,b | Mean | 3.8554 | 3.8355 | 5.5702 | 4.9929 | 4.9600 | -.0287 |
| Std. Deviation | .27927 | .61279 | .43504 | .39534 | .82429 | .68390 |
| Most Extreme Differences | Absolute | .065 | .273 | .086 | .078 | .227 | .135 |
| Positive | .065 | .228 | .055 | .047 | .184 | .135 |
| Negative | -.043 | -.273 | -.086 | -.078 | -.227 | -.085 |
| Kolmogorov-Smirnov Z | | .614 | 2.565 | .809 | .736 | 2.130 | 1.268 |
| Asymp. Sig. (2-tailed) | | .845 | .000 | .530 | .651 | .000 | .080 |
|  |  | Time domain parameters | | | |  |  |
|  |  | SDNN | RMSSD | NN50 | PNN50 |  |  |
| Normal Parametersa,b | Mean | 3.6979 | 3.4121 | 3.6211 | 1.9533 |  |  |
| Std. Deviation | .52334 | .58426 | 2.00124 | 1.81578 |  |  |
| Most Extreme Differences | Absolute | .057 | .103 | .181 | .150 |  |  |
| Positive | .046 | .071 | .113 | .108 |  |  |
| Negative | -.057 | -.103 | -.181 | -.150 |  |  |
| Kolmogorov-Smirnov Z | | .535 | .962 | 1.701 | 1.405 |  |  |
| Asymp. Sig. (2-tailed) | | .937 | .313 | .006 | .039 |  |  |

*FFT Spectrum – Fast fourier transformation; LS – Lomb Scargle

We conducted Spearman’s correlation analysis for those parameters that exhibited skewed distribution on Kolmogorov Smirnov test. They were NN50, pNN50, HF n.u, HF ms2.

**Table S2: Correlation analysis between uric acid and HRV parameters after deletion of non vegetarians and alcoholics.**

|  |  | **Group** | **Normo** | | **Prehyp** | | **Hyper** | |
| --- | --- | --- | --- | --- | --- | --- | --- | --- |
|  |  | **r** | **P** | **r** | **P** | **r** | **P** |
| **PEARSON'S** | **FFT SPECTRUM** | **LF/HF power** | .254 | .343 | .516* | .014 | .350 | .563 |
| **LF power n.u** | .267 | .317 | .368 | .092 | -.148 | .812 |
| **HF power n.u** | -.267 | .317 | -.351 | .109 | -.677 | .210 |
| **VLF power ms2** | .456 | .076 | -.234 | .294 | -.886* | .045 |
| **LF power ms2** | .289 | .278 | -.379 | .082 | -.250 | .685 |
| **HF power ms2** | .014 | .958 | -.354 | .106 | -.546 | .341 |
|  | **SDNN** | .093 | .731 | -.388 | .074 | -.760 | .136 |
|  | **RMSSD** | .011 | .969 | -.310 | .160 | .034 | .957 |
| **LS** | **LF/HF** | .526* | .036 | -.119 | .597 | .667 | .219 |
| **LS n.u** | .184 | .496 | .203 | .364 | .413 | .489 |
| **VLF_ms2** | .206 | .444 | -.119 | .599 | -.785 | .116 |
| **LF_ms2** | .435 | .092 | .132 | .559 | .202 | .745 |
| **SPEARMAN'S** |  | **NN50** | -.237 | .378 | -.275 | .216 | -.100 | .873 |
|  | **PNN50** | -.095 | .726 | -.272 | .221 | -.100 | .873 |
| **LS** | **HF_nu** | -.314 | .237 | -.356 | .104 | -.300 | .624 |
| **HF_ms2** | -.528* | .036 | -.499* | .018 | -.100 | .873 |
